# Supplementary material for: Anti-inflammatory efficacy of Berberine Nanomicelle for improvement of cerebral ischemia: formulation, characterization and evaluation in bilateral common carotid artery occlusion rat model
Source: BMC Pharmacol Toxicol. 2021 Oct 3;22:54. doi: 10.1186/s40360-021-00525-7 (PMC8487542; doi:10.1186/s40360-021-00525-7)
Supplement: Supplementary file 2 — Additional file 2. [file 40360_2021_525_MOESM2_ESM.xlsx]

## Sheet: Sheet1
MDA(nmol/mg)
Control	Stroke	nanomicelles	Ber 100mg/kg	NBer 100mg/kg	NBer 75mg/kg	NBer 50mg/kg	NBer 25mg/kg
3.28	4.83	4.8	4.08	3.78	3.78	4.28	4.8
3.45	4.7	4.88	4.23	3.55	3.55	4.1	4.68
3.44	4.68	4.85	4.22	3.49	3.55	4.27	4.81
3.76	4.72	4.8	4	3.54	3.74	4.12	4.71
IL-1b(pg/mg)
Control	Stroke	nanomicelles	Ber 100mg/kg	NBer 100mg/kg	NBer 75mg/kg	NBer 50mg/kg	NBer 25mg/kg
3.23	5.7	6.2	4.11	3.91	4.11	5.21	5.3
3.5	5.93	5.84	5.18	3.38	3.48	4.58	5.73
3.4	6.01	5.9	4.67	3.72	3.67	5.15	5.51
3.41	5.72	5.84	4.19	3.75	4	5.14	5.5
TNF-a(pg/mg )
Control	Stroke	nanomicelles	Ber 100mg/kg	NBer 100mg/kg	NBer 75mg/kg	NBer 50mg/kg	NBer 25mg/kg
5.04	8.2	9.98	6.78	5.98	6.48	7.98	10
4.38	9.84	10.15	6.38	5.38	6.18	5.78	9.15
4.2	9.94	7.86	7.07	6.47	6.57	6.77	7.66
4.21	9.85	7.88	6.37	5.5	6.2	5.77	7.5
